# Supplementary material
Source: HighWire-hosted journal article supplement (https://erj.ersjournals.com/highwire/filestream/113806/field_highwire_adjunct_files/0/ERJ-01343-2012_Disclosures.pdf)
Supplement: ERJ-01343-2012_Disclosures.pdf [file ERJ-01343-2012_Disclosures.pdf]

**F.J. Wilson** was employed by Pfizer Ltd and held stock options in Pfizer Inc. during completion of the work described.

**W. MacNee** has acted in an advisory capacity for GSK, Pfizer, Novartis and Almirall, has received payment from GSK and Pfizer for research programmes and clinical activities, and has also received payments from Boehringer-Ingelheim, GSK, AstraZeneca, Novartis and Janssen to travel to meetings and/or present at conferences.
